# Supplementary material for: Histone H3 Methyltransferase Suv39h1 Prevents Myogenic Terminal Differentiation by Repressing MEF2 Activity in Muscle Cells
Source: MDPI journal article supplement (doi:10.3390/ijms17121908), 2016-11-28
Supplement: s1 [file s1]

## Supplementary Material: Histone H3 Methyltransferase Suv39h1 Prevents Myogenic Terminal Differentiation by Repressing MEF2 Activity in Muscle Cells

Wei Jin, Yangyang Shang, Jian Peng and Siwen Jiang

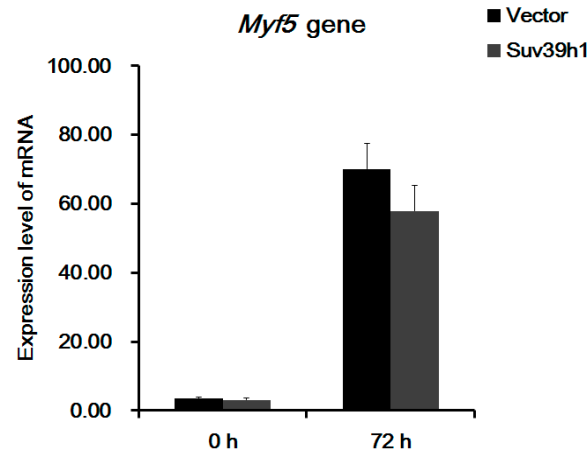

**Figure S1.** C2C12 cells were transfected with pIRES-Suv39h1 or empty vector as a control. Cells were transferred to differentiation medium (2% HS) for the indicated time, and expression of *Myf5* was analyzed by qRT-PCR. The results were normalized against  $\beta$ -actin. Bars represented the mean  $\pm$  SD of three experiments. The statistical significance of the differences values was analyzed by Student's *t*-test.
